# Supplementary material
Source: PubMed Central journal article supplement (PMC29655)
Supplement: nar_29_2_499__1.pdf [file nar_29_2_499__1.pdf]

## SUPPLEMENTARY MATERIAL

**Table S1.** Proton, carbon and phosphorus assignments<sup>a</sup> for GCN4 cognate DNA

| Residue | H1'  | H2'  | H2'' | H3'  | H4'  | H5'  | H5'' | H6/H8 | H2/H5/Me | C8/C6  | C2/C5/CMe | C1'   | C2'   | C3'   | C4'   | P |
|---------|------|------|------|------|------|------|------|-------|----------|--------|-----------|-------|-------|-------|-------|---|
| C1      | 5.76 | 2.00 | 2.44 | 4.73 | 4.07 | 4.17 | 7.71 | 5.97  | 143.00   | 98.80  | 84.20     | 40.70 | 76.48 | 87.72 | -4.10 |   |
| A2      | 6.32 | 2.79 | 2.96 | 5.05 | 4.44 | 4.27 | 8.41 | 7.84  | 141.60   | 154.40 | 84.24     | 40.50 | 80.18 | 87.17 | -4.54 |   |
|         |      |      |      |      |      | 4.16 |      |       |          |        |           |       |       |       |       |   |
| T3      | 5.72 | 1.94 | 2.34 | 4.87 | 4.18 | 4.07 | 7.14 | 1.46  | 137.80   | 14.37  | 84.89     | 39.50 | 76.62 | 84.82 | -4.18 |   |
|         |      |      |      |      |      | 4.27 |      |       |          |        |           |       |       |       |       |   |
| G4      | 5.55 | 2.67 | 2.77 | 5.02 | 4.36 | 4.17 | 7.84 | -     | 137.80   | -      | 83.92     | 40.73 | 79.52 | 86.42 | -4.17 |   |
|         |      |      |      |      |      | 4.07 |      |       |          |        |           |       |       |       |       |   |
| A5      | 6.22 | 2.65 | 2.88 | 5.04 | 4.46 | 4.22 | 8.14 | 7.74  | 140.60   | 154.70 | 84.14     | 41.42 | 79.70 | 87.12 | -4.35 |   |
|         |      |      |      |      |      | 4.14 |      |       |          |        |           |       |       |       |       |   |
| C6      | 5.60 | 2.00 | 2.35 | 4.80 | 4.15 | 4.23 | 7.19 | 5.20  | 141.39   | 97.63  | 84.40     | 40.38 | 76.88 | 84.67 | -4.06 |   |
| G7      | 5.96 | 2.57 | 2.77 | 4.92 | 4.36 | 4.21 | 7.76 | -     | 137.80   | -      | 84.15     | 41.35 | 79.48 | 86.42 | -4.52 |   |
|         |      |      |      |      |      | 4.14 |      |       |          |        |           |       |       |       |       |   |
| T8      | 6.01 | 2.11 | 2.50 | 4.88 | 4.23 | 4.13 | 7.24 | 1.35  | 138.00   | 14.38  | 84.31     | 39.75 | 77.40 | 85.32 | -4.34 |   |
| C9      | 5.60 | 2.11 | 2.43 | 4.87 | 4.15 | 4.23 | 7.56 | 5.69  | 143.42   | 97.96  | 84.50     | 39.95 | 78.12 | 84.67 | -4.00 |   |
| A10     | 6.26 | 2.71 | 2.91 | 5.04 | 4.43 | 4.26 | 8.34 | 7.68  | 141.40   | 154.50 | 84.22     | 40.90 | 79.70 | 86.82 | -4.45 |   |
|         |      |      |      |      |      | 4.13 |      |       |          |        |           |       |       |       |       |   |
| T11     | 5.84 | 1.88 | 2.32 | 4.85 | 4.15 | 4.26 | 7.14 | 1.54  | 137.80   | 14.42  | 84.15     | 39.50 | 76.62 | 85.02 | -4.13 |   |
| G12     | 6.16 | 2.59 | 2.38 | 4.69 | 4.19 | 4.08 | 7.90 | -     | 138.50   | -      | 84.10     | 42.25 | 78.06 | 87.23 | -     |   |

<sup>a</sup>Proton chemical shifts are referenced with respect to TSP [sodium 3-trimethylsilyl-(2,2,3,3-<sup>2</sup>H<sub>4</sub>) propionate], carbon indirectly referenced with respect to DSS [2,2-dimethyl-2-silapentane-5-sulfonic acid] and phosphorus with respect to TMP [trimethylphosphate].
